# Supplementary material
Source: HighWire-hosted journal article supplement (https://erj.ersjournals.com/content/54/2/1900547)
Supplement: inline-supplementary-material-2 [file inline-supplementary-material-2.pdf]

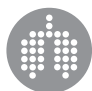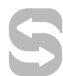

SHAREABLE PDF

# Neutrophilic inflammation in asthma and defective epithelial translational control

Abilash Ravi<sup>1,2</sup>, Saheli Chowdhury<sup>1,2</sup>, Annemiek Dijkhuis<sup>2</sup>, Peter I. Bonta<sup>1</sup>, Peter J. Sterk<sup>1</sup> and René Lutter<sup>1,2</sup>

**Affiliations:** <sup>1</sup>Amsterdam UMC, University of Amsterdam, Dept of Respiratory Medicine, Amsterdam, The Netherlands. <sup>2</sup>Amsterdam UMC, University of Amsterdam, Dept of Experimental Immunology, Amsterdam Infection and Immunity Institute, Amsterdam, The Netherlands.

**Correspondence:** René Lutter, Amsterdam University Medical Centers, University of Amsterdam, Depts Exp. Immunology/Respiratory Medicine, K0-150, P.O. Box 22700, Amsterdam, 1100 DE, The Netherlands. E-mail: r.lutter@amsterdamumc.nl

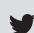

@ERSpublications

**Defective translational control of neutrophil-driving cytokines in bronchial epithelium leads to exaggerated, corticosteroid-insensitive production *in vitro* and correlates with neutrophilic inflammation in airway lumen and FEV<sub>1</sub> reversibility** <http://bit.ly/2VrHS2M>

**Cite this article as:** Ravi A, Chowdhury S, Dijkhuis A, *et al.* Neutrophilic inflammation in asthma and defective epithelial translational control. *Eur Respir J* 2019; 54: 1900547 [<https://doi.org/10.1183/13993003.00547-2019>].

This single-page version can be shared freely online.

**ABSTRACT** Neutrophilic inflammation in asthma is associated with interleukin (IL)-17A, corticosteroid-insensitivity and bronchodilator-induced forced expiratory volume in 1 s (FEV<sub>1</sub>) reversibility. IL-17A synergises with tumour necrosis factor (TNF)- $\alpha$  in the production of the neutrophil chemokine CXCL-8 by primary bronchial epithelial cells (PBECs).

We hypothesised that local neutrophilic inflammation in asthma correlates with IL-17A and TNF- $\alpha$ -induced CXCL-8 production by PBECs from asthma patients.

PBECs from most asthma patients displayed an exaggerated CXCL-8 production in response to TNF- $\alpha$  and IL-17A, but not to TNF- $\alpha$  alone, and which was also insensitive to corticosteroids. This hyperresponsiveness of PBECs strongly correlated with CXCL-8 levels and neutrophil numbers in bronchoalveolar lavage from the corresponding patients, but not with that of eosinophils. In addition, this hyperresponsiveness also correlated with bronchodilator-induced FEV<sub>1</sub> % reversibility. At the molecular level, epithelial hyperresponsiveness was associated with failure of the translational repressor T-cell internal antigen-1 related protein (TiAR) to translocate to the cytoplasm to halt CXCL-8 production, as confirmed by TiAR knockdown. This is in line with the finding that hyperresponsive PBECs also produced enhanced levels of other inflammatory mediators.

Hyperresponsive PBECs in asthma patients may underlie neutrophilic and corticosteroid-insensitive inflammation and a reduced FEV<sub>1</sub>, irrespective of eosinophilic inflammation. Normalising cytoplasmic translocation of TiAR is a potential therapeutic target in neutrophilic, corticosteroid-insensitive asthma.
